# Supplementary material for: De Facto States: Survival and Disappearance (1945–2011)
Source: Oxford University Press journal article supplement (doi:10.1093/isq/sqw049), 2017-03-23
Supplement: sqw049_Supp.zip [file sqw049_Supp.zip]

Archive with 2 entries (2 files):
- Codebook February 2016.pdf
- dfs survival supplementary materials ISQ .pdf
